# Supplementary material
Source: HighWire-hosted journal article supplement (https://jitc.bmj.com/content/8/2/e000515)
Supplement: inline-supplementary-material-1 [file inline-supplementary-material-1.xlsx]

## Sheet: Prostate cancer
	Table1	Clinical characteristics of patients
		with prostate cancer before treatment
	Patient	Age (y)	Gender	TNM	Disease	LILRB1+
					stage	NK cell(%)
	1	65	Male	pT2N0MX	2B	53
	2	70	Male	mpT2N0MX	2B	70
	3	64	Male	mpT2N0MX	2B	48
	4	68	Male	mpT2N0MX	2B	59
	5	70	Male	mpT2N0MX	2B	23.9
	6	66	Male	pT2N0MX	2B	24
	7	66	Male	mpT2NxMx	2B	20
	8	62	Male	mpT2N0MX	2B	40
	9	66	Male	unknown	2b	37
	10	64	Male	unknown	2b	26
	11	57	Male	unknown	2b	23
	12	68	Male	unknown	2b	39
	13	67	Male	mpT2N0MX	2C	20
	14	72	Male	pT2N0MX	2C	33
	15	65	Male	pT2N0MX	2C	21.1
	16	70	Male	unknown	2C	10
	17	50	Male	mpT3aN0MX	3B	74.2
	18	52	Male	pT3aN0MX	3B	47
	19	71	Male	mpT3aN0MX	3B	29.6
	20	68	Male	mpT3aN0MX	3B	27.5
	21	73	Male	mpT3bN0MX	3B	30
	22	80	Male	mpT3N0MX	3B	40
	23	77	Male	pT3bN1Mx	3B	15
	24	65	Male	mpT3aN0MX	3B	35
	25	69	Male	mpT3aN0MX	3B	20
	26	57	Male	unknown	3B	78.4
	27	60	Male	unknown	3B	44
	28	52	Male	unknown	3b	40
	29	51	Male	unknown	3b	52
	30	72	Male	unknown	3b	50.8
	31	69	Male	unknown	3C	27
	32	67	Male	unknown	3C	60
	33	75	Male	unknown	3C	45.5
	Abbreviations:
	TNM, tumor-node-metastasis
