# Supplementary material
Source: HighWire-hosted journal article supplement (https://jitc.bmj.com/content/8/2/e000515)
Supplement: inline-supplementary-material-4 [file inline-supplementary-material-4.xlsx]

## Sheet: ELISA
Table 3	Anti-LILRB1 B cell clone accessed by ELISA
#clone	OD450		#clone	OD450		#clone	OD450		#clone	OD450		#clone	OD450
1	2.11		47	2.36		93	1.72		139	2.1		185	1.67
2	1.58		48	2.01		94	1.98		140	1.93		186	2.01
3	2.11		49	2.34		95	1.95		141	1.84		187	1.98
4	2.47		50	2.16		96	1.97		142	1.84		188	2.02
5	2.27		51	1.9		97	1.16		143	2.4		189	2.12
6	1.6		52	2.27		98	2.01		144	1.64		190	1.9
7	2.4		53	2.09		99	2.05		145	1.97		191	1.99
8	1.23		54	1.36		100	1.79		146	1.44		192	1.84
9	2.36		55	1.3		101	2.32		147	2.51		193	2.19
10	2.17		56	2.09		102	1.45		148	1.96		194	1.87
11	1.77		57	2.02		103	2.33		149	1.95		195	1.8
12	2.36		58	2.26		104	2.15		150	1.97		196	2.27
13	1.03		59	1.9		105	2.2		151	2.03		197	1.87
14	2.54		60	1.23		106	2.11		152	0.11		198	2.28
15	2.5		61	2.38		107	1.15		153	0.1		199	2.01
16	1.85		62	1.96		108	2.04		154	1.98		200	2.27
17	1.78		63	2.1		109	1.64		155	2.06		201	1.78
18	2.41		64	1.97		110	2.31		156	2.21		202	1.95
19	2.32		65	1.12		111	2.1		157	0.12		203	1.75
20	1.97		66	1.78		112	1.99		158	0.13		204	2.03
21	1.3		67	1.34		113	1.73		159	1.89		205	1.82
22	1.84		68	2.03		114	1.89		160	1.87		206	1.87
23	1.67		69	1.39		115	1.53		161	1.85		207	1.93
24	1.08		70	1.36		116	2.06		162	2.02		208	1.31
25	2.3		71	1.39		117	2.23		163	1.49		209	2.18
26	2.48		72	2.25		118	2.06		164	2.26		210	1.75
27	2.56		73	1.7		119	1.26		165	2.1		211	2.29
28	2.27		74	2.4		120	1.4		166	2.22		212	2.24
29	1.79		75	2.06		121	2.06		167	1.12		213	0.08
30	2.28		76	2.14		122	1.47		168	1.77		214	0.09
31	1.75		77	2.26		123	1.86		169	2.01		215	1.26
32	2.04		78	1.87		124	1.66		170	2.26		216	1.97
33	2.2		79	2.32		125	2.43		171	1.79		217	1.55
34	1.98		80	2.11		126	2.45		172	1.97		218	1.92
35	2.01		81	1.11		127	1.87		173	2.14		219	2.22
36	2.15		82	1.97		128	2.51		174	2.02		220	2.24
37	2.13		83	2.32		129	2.42		175	2.02		221	1.64
38	2.32		84	1.88		130	2.07		176	2.06		222	1.87
39	1.02		85	2.28		131	1.8		177	2.04		223	1.79
40	2.19		86	1.97		132	2.2		178	1.81		224	2.09
41	2.26		87	2.28		133	2.15		179	2.3		225	2.07
42	1.73		88	2.42		134	2.05		180	1.27		226	2.38
43	2.04		89	1.97		135	1.93		181	1.97		227	2.08
44	2		90	2.39		136	2.42		182	0.09		228	0.13
45	1.08		91	1.8		137	2.1		183	2.1		229	1.07
46	1.4		92	1.96		138	2.04		184	2.07		Ctrl	0.1
